# Supplementary material
Source: PubMed Central journal article supplement (PMC11072162)

# **Coupled fibromodulin and SOX2 signaling as a critical regulator of metastatic outgrowth in melanoma**

Victor O. Oria, Hongyi Zhang, Christopher R. Zito, Chetan K. Rane, Xian-Yong Ma, Olivia K. Provance, Thuy T. Tran, Adebowale Adeniran, Yuval Kluger, Mario Sznol, Marcus W. Bosenberg, Harriet M. Kluger, **Lucia B. Jilaveanu\***

**\*Corresponding Author**

[lucia.jilaveanu@yale.edu](mailto:lucia.jilaveanu@yale.edu)

**List of Supplementary Figures**

# Supplementary Fig. 1

**A**

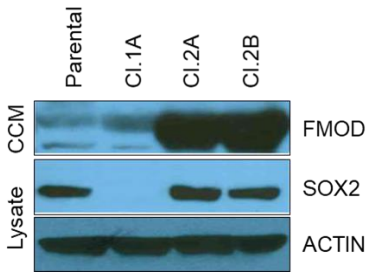

**B**

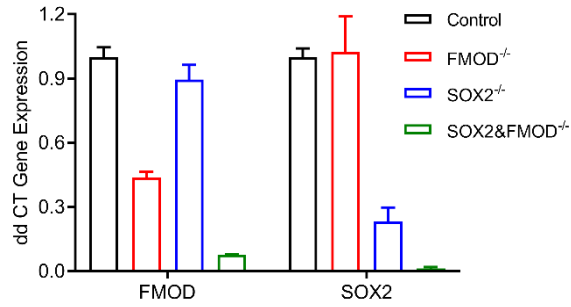

**C**

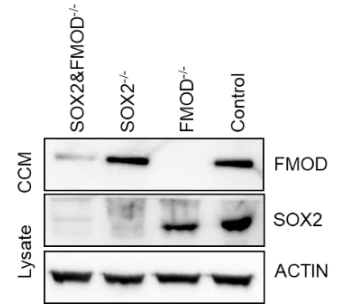

**D**

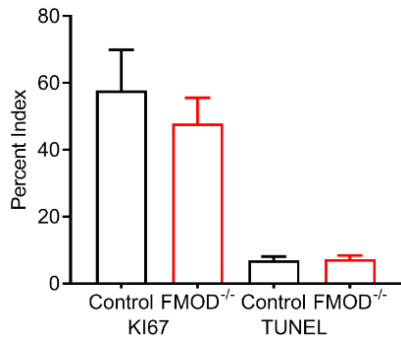

**E**

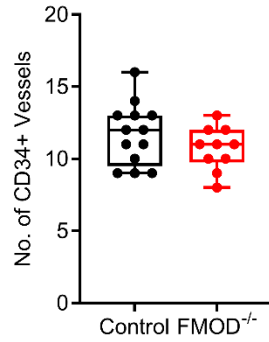

**F**

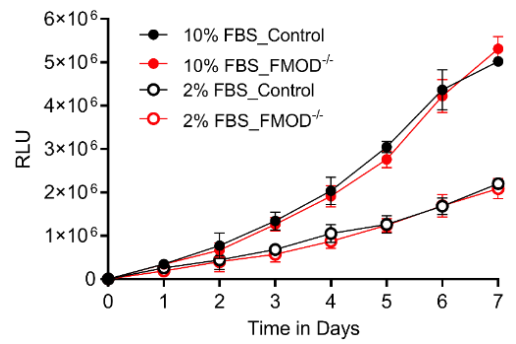

**G**

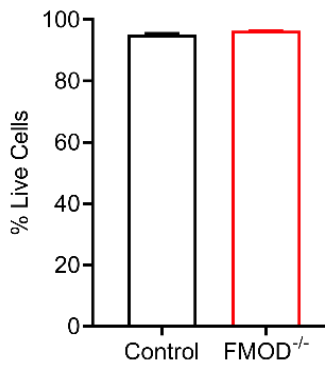

**H**

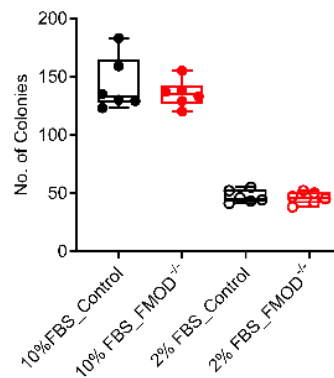

**I**

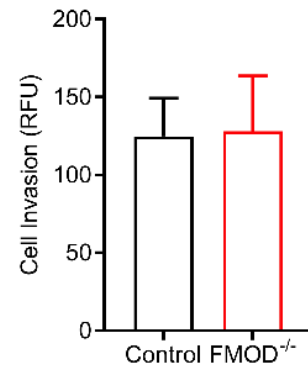

# Supplementary Fig. 2

**A**

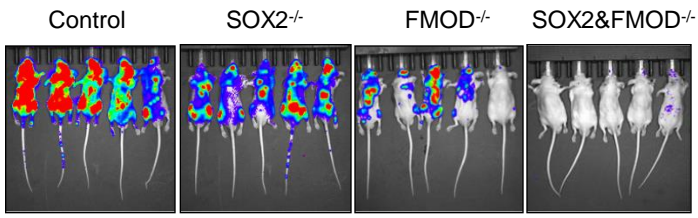

**B**

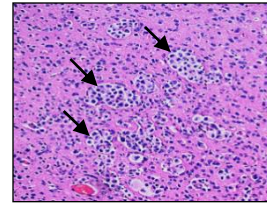

**C**

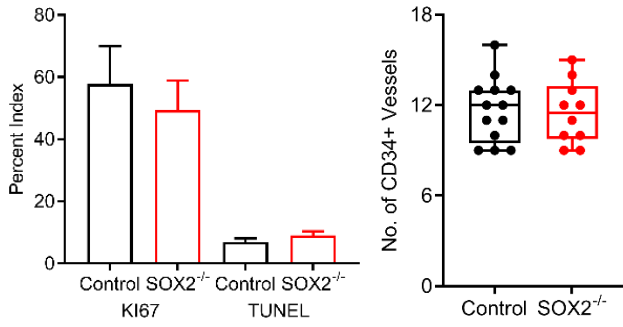

**D**

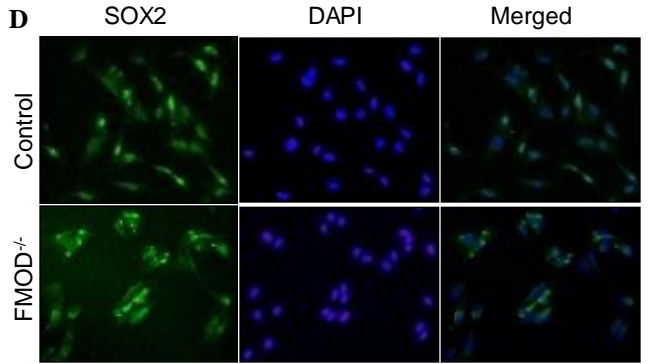

**E**

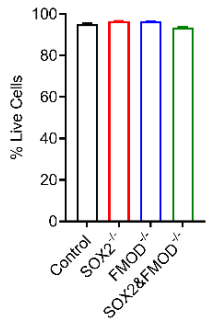

**F**

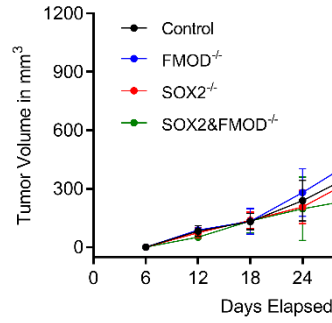

**G**

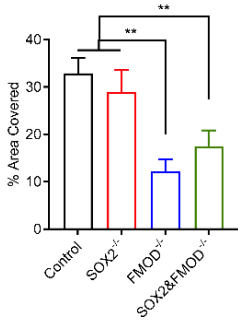

**H**

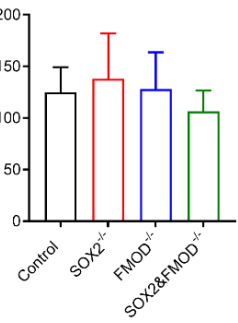

**I**

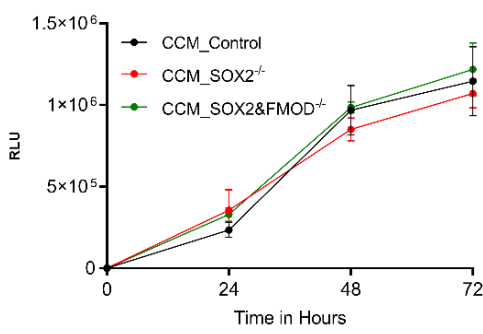

**J**

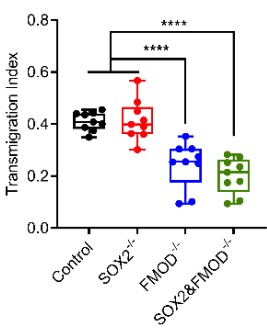

**K**

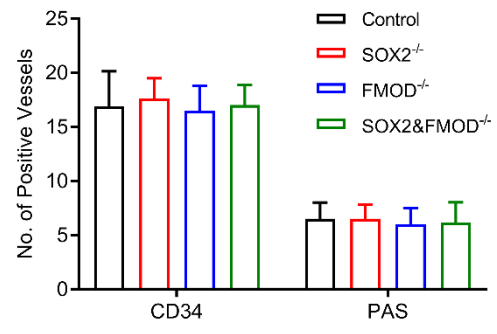

Supplementary Fig. 3

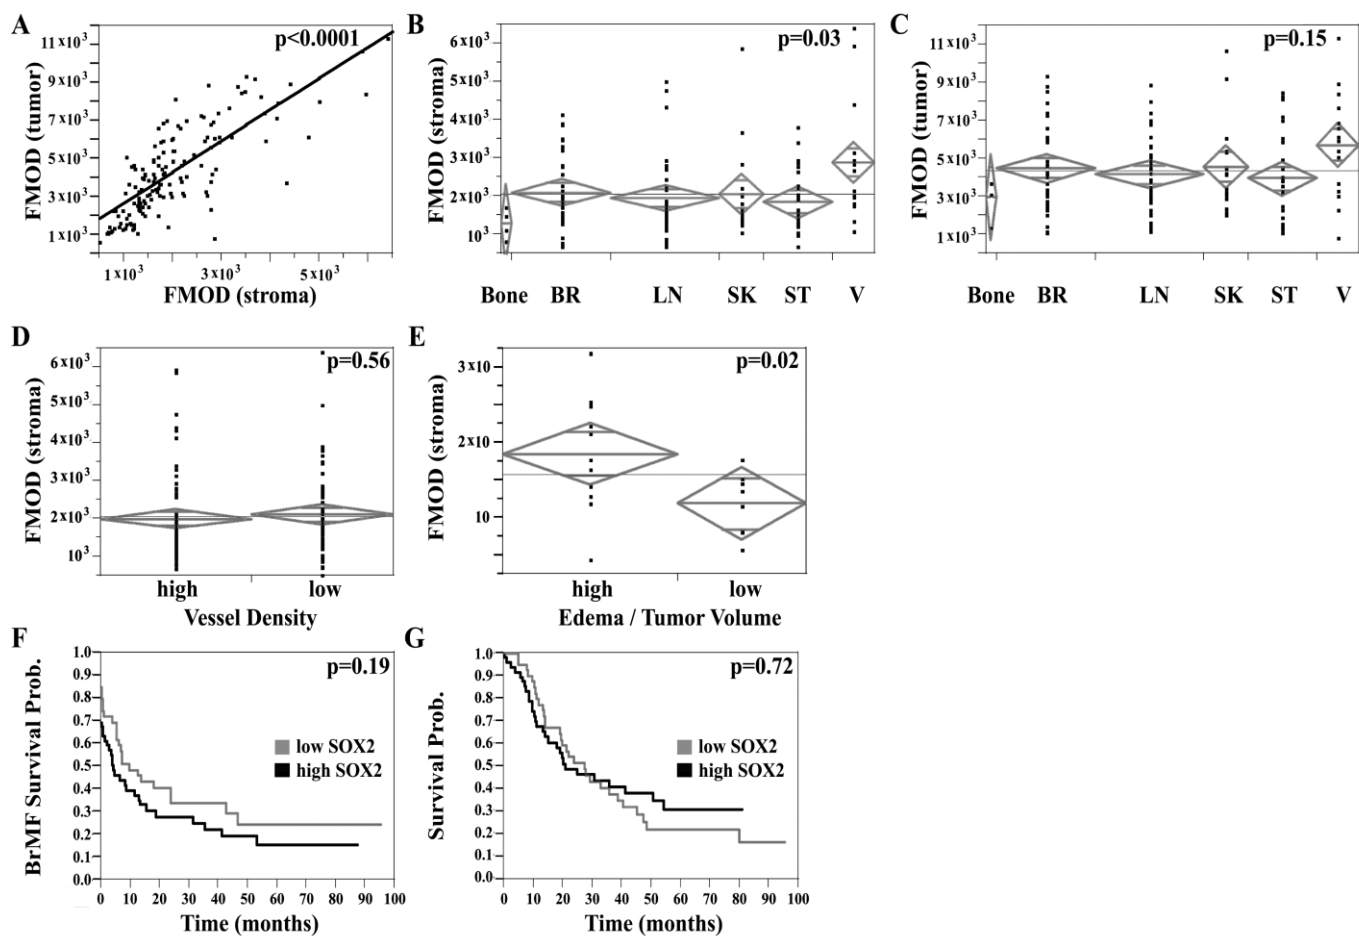

Supplement: 18_2022_4364_MOESM2_ESM.pdf [file 18_2022_4364_MOESM2_ESM.pdf]
